# Supplementary material
Source: PubMed Central journal article supplement (PMC7442699)

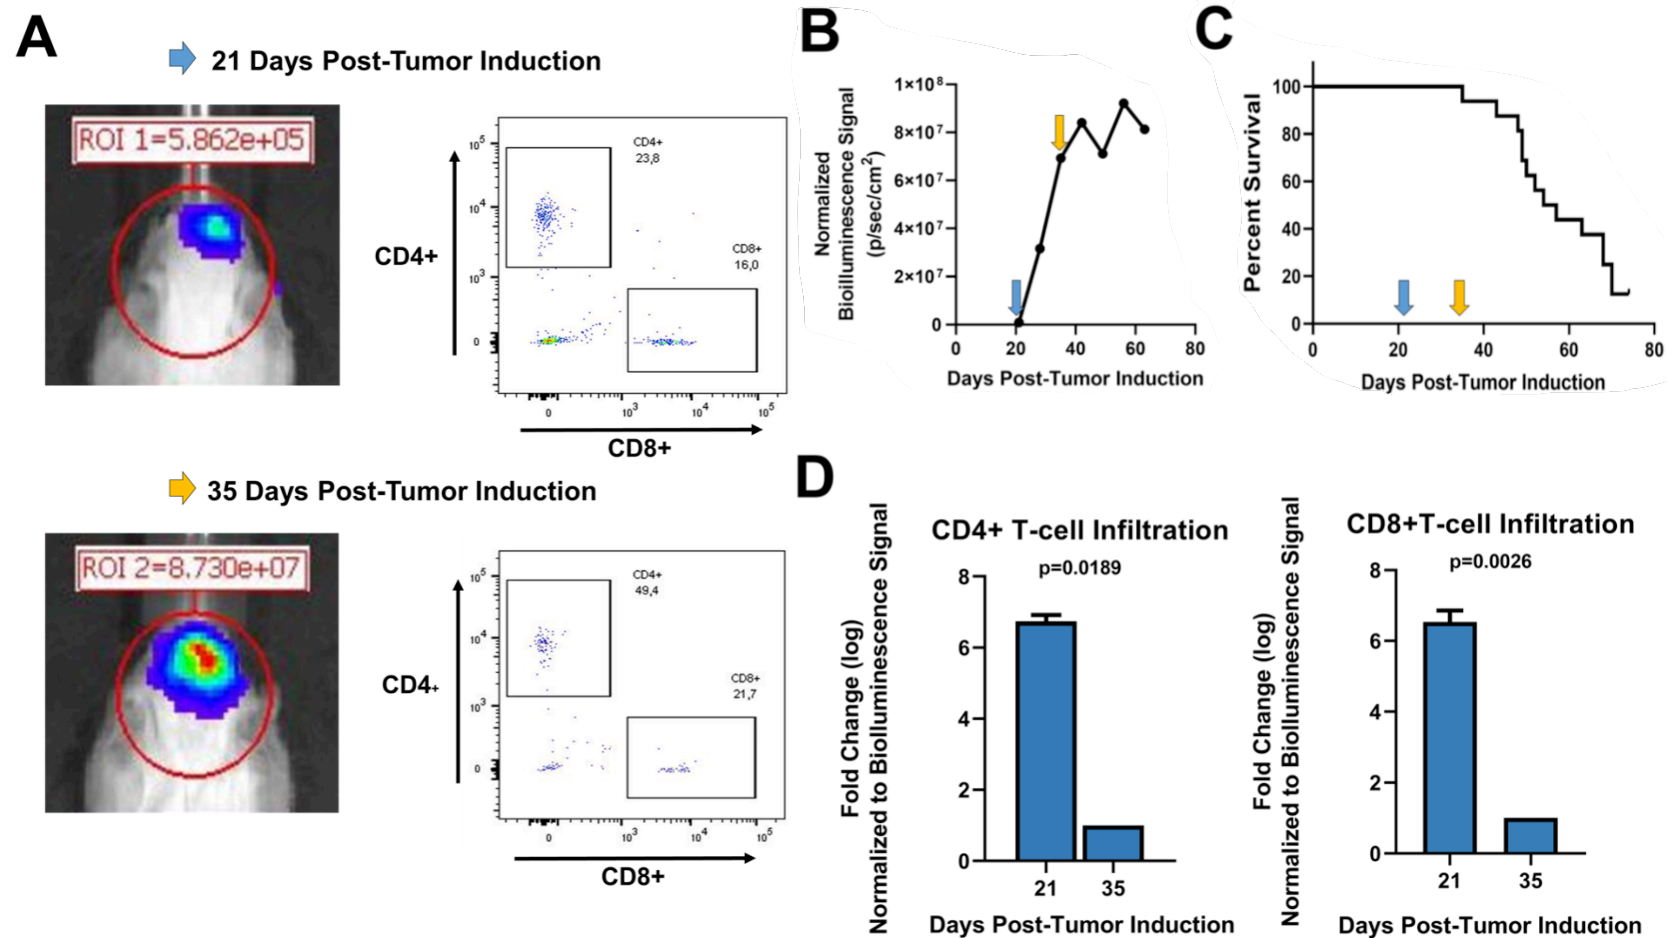

Supplement: NIHMS1596635-supplement-1.pdf [file NIHMS1596635-supplement-1.pdf]

## A

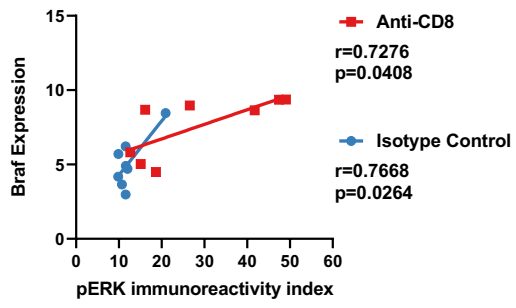

## B

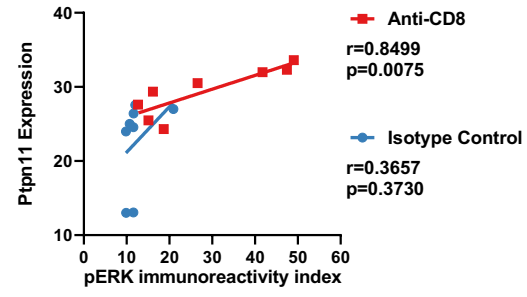

## C

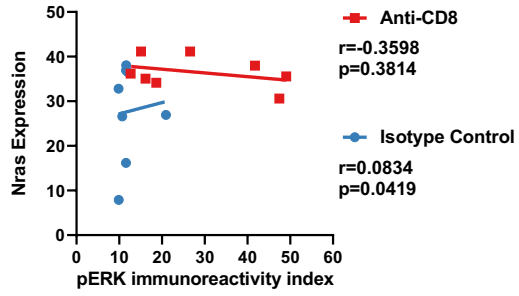

## D

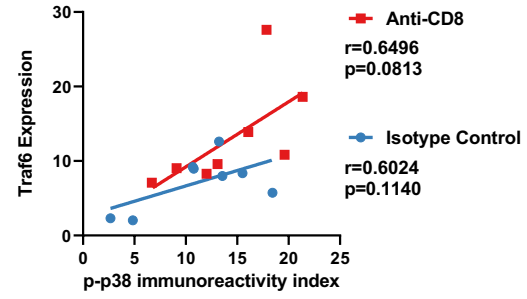

Supplement: NIHMS1596635-supplement-2.pdf [file NIHMS1596635-supplement-2.pdf]

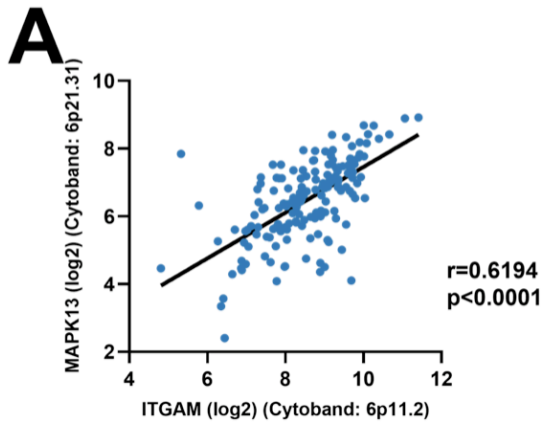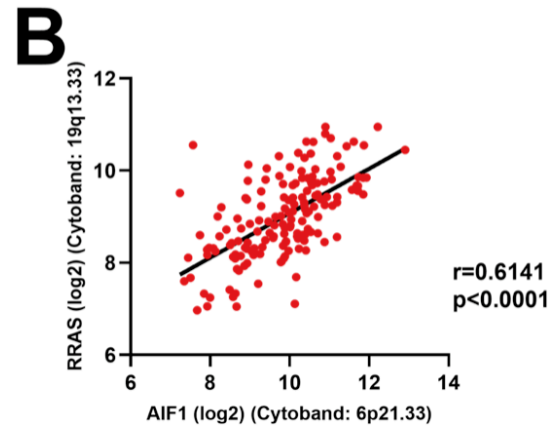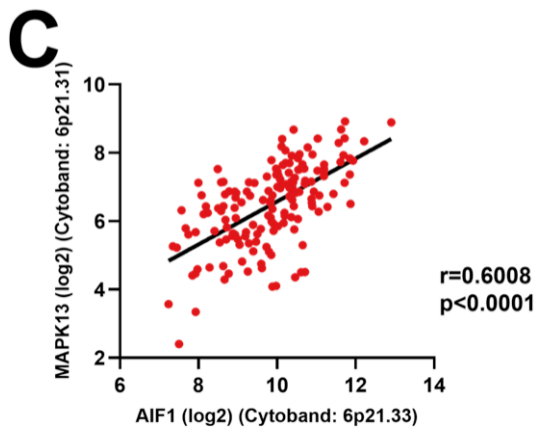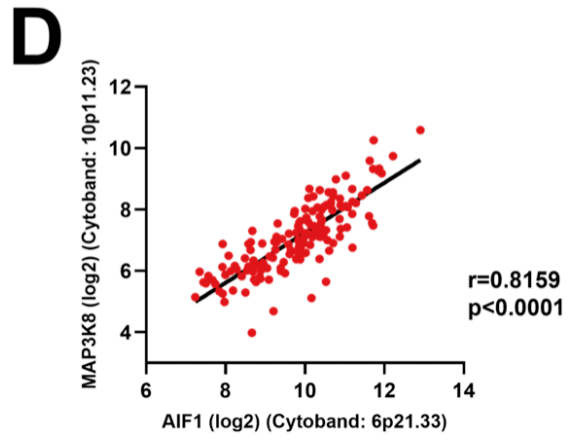

Supplement: NIHMS1596635-supplement-3.pdf [file NIHMS1596635-supplement-3.pdf]
